# Supplementary material
Source: PubMed Central journal article supplement (PMC2737955)
Supplement: supp_191_18_5785__1.pdf [file supp_191_18_5785__1.pdf]

TABLE S1. Phenotypic data for *P. aeruginosa* PA14 mutants

| Locus <sup>a</sup> (Mutated gene)                 | Mutant ID | Description                              | QS-dependent phenotypes <sup>b</sup> |                         |                        |                      |
|---------------------------------------------------|-----------|------------------------------------------|--------------------------------------|-------------------------|------------------------|----------------------|
|                                                   |           |                                          | Skim-milk proteolysis                | Staphylolytic activity  | Rhamnolipid production | Pyocyanin production |
| PA14 wild type                                    |           |                                          | +++                                  | +++                     | +++                    | +++                  |
| <i>QS core genes</i>                              |           |                                          |                                      |                         |                        |                      |
| PA14_19120 ( <i>rhlR</i> )                        | 37943     | Transcriptional regulator                | +++,,+,+ <sup>d</sup>                | +                       | -                      | -                    |
| PA14_19130 ( <i>rhlI</i> )                        | 33961     | Autoinducer synthesis protein RhlI       | +++,,+,+ <sup>d</sup>                | +                       | ++                     | -                    |
| PA14_39980 ( <i>qscR</i> )                        | 42798     | Transcriptional regulator                | +++                                  | +++                     | +++                    | ++                   |
| PA14_45940 ( <i>lasI</i> )                        | 39292     | Autoinducer synthesis protein LasI       | +                                    | -                       | ++                     | -                    |
| PA14_45960 ( <i>lasR</i> ) <sup>c</sup>           | N/A       | Transcriptional regulator                | -                                    | -                       | ++                     | -                    |
| <i>Known QS regulatory genes not rediscovered</i> |           |                                          |                                      |                         |                        |                      |
| PA14_17480 ( <i>rpoS</i> )                        | 32095     | Sigma factor RpoS                        | +++                                  | ++                      | +++                    | ++                   |
| PA14_45950 ( <i>rsaL</i> )                        | 46524     | Regulatory protein RsaL                  | +++                                  | +++                     | ++                     | +++                  |
| PA14_51340 ( <i>mvfR</i> )                        | 47015     | Transcriptional regulator MvfR           | +++                                  | +++                     | ++                     | +++                  |
| PA14_52180 ( <i>relA</i> )                        | 55087     | GTP pyrophosphokinase                    | +++                                  | +++                     | ++                     | +++                  |
| PA14_52570 ( <i>rsmA</i> )                        | 44507     | RsmA, regulator of secondary metabolites | +++                                  | +++                     | +++                    | +++                  |
| PA14_56070 ( <i>mvaT</i> )                        | 34492     | Transcriptional regulator MvaT           | +++                                  | +++                     | ++                     | +++                  |
| PA14_62530 ( <i>cbrA</i> )                        | 33836     | Two component sensor CbrA                | +++                                  | +++                     | ++                     | +++                  |
| <i>Known QS regulatory genes rediscovered</i>     |           |                                          |                                      |                         |                        |                      |
| PA14_08370 ( <i>vfr</i> )                         | 52692     | Cyclic AMP receptor-like protein         | ++                                   | -, +, - <sup>d</sup>    | ++                     | +                    |
| PA14_30650 ( <i>gacA</i> )                        | 54630     | Response regulator GacA                  | ++                                   | -, +, +, - <sup>d</sup> | +++                    | -                    |
| PA14_57940 ( <i>rpoN</i> )                        | 44482     | RNA polymerase sigma-54 factor           | ++                                   | +++                     | NG                     | +++                  |
| PA14_62490 ( <i>dksA</i> )                        | 41617     | Suppressor protein DksA                  | ++                                   | +++                     | -                      | +++                  |
| <i>Novel genes</i>                                |           |                                          |                                      |                         |                        |                      |
| PA14_05260 ( <i>pyrB</i> )                        | 52690     | Aspartate carbamoyltransferase           | ++                                   | +++                     | NG                     | -                    |
| PA14_05380 ( <i>pilK</i> )                        | 52952     | Methyltransferase PilK                   | ++                                   | +++                     | ++                     | ++                   |
| PA14_05620 ( <i>sahH</i> )                        | 56708     | S-adenosyl-L-homocysteine hydrolase      | +                                    | ++                      | NG                     | +                    |
| PA14_07700 ( <i>apaH</i> )                        | 36226     | Bis(5'-nucleosyl)-tetraphosphatase       | -                                    | ++                      | ++                     | +++                  |
| PA14_09520 ( <i>mexI</i> )                        | 43615     | Probable RND efflux transporter          | ++                                   | ++                      | +++                    | ++                   |
| PA14_12080 ( <i>sltB1</i> )                       | 27636     | Soluble lytic transglycosylase B         | ++                                   | +++                     | ++                     | ++                   |



|                                 |       |                                          |                         |                         |     |                         |
|---------------------------------|-------|------------------------------------------|-------------------------|-------------------------|-----|-------------------------|
| PA14_52040 ( <i>purM</i> )      | 47921 | Phosphoribosylaminoimidazole synthetase  | ++                      | +++                     | NG  | ++                      |
| PA14_54370 ( <i>lepA</i> )      | 38761 | GTP-binding protein LepA                 | -                       | -                       | +++ | ++                      |
| PA14_56300                      | 35583 | Putative fumarase                        | ++                      | +++                     | ++  | +++                     |
| PA14_58600                      | 27307 | Conserved hypothetical protein           | ++                      | +++                     | +++ | +++                     |
| PA14_60280 ( <i>fimU</i> )      | 44085 | Type 4 fimbrial biogenesis protein FimU  | ++                      | +++, ++, - <sup>d</sup> | ++  | +++, ++, - <sup>d</sup> |
| PA14_62560 ( <i>pcnB</i> )      | 41679 | Poly(A) polymerase                       | ++                      | ++                      | ++  | ++                      |
| PA14_62930 ( <i>carA</i> )      | 39940 | Carbamoyl-phosphate synthase small chain | -                       | +++                     | NG  | +                       |
| PA14_64220 ( <i>purD</i> )      | 29794 | Phosphoribosylamine-glycine ligase       | ++                      | +++                     | NG  | ++                      |
| PA14_66110                      | 56681 | Putative glycosyl transferase            | ++                      | +++                     | ++  | +++                     |
| PA14_66600 ( <i>aroB</i> )      | 38358 | 3-dehydroquinate synthase                | ++                      | ++                      | NG  | -                       |
| PA14_66940 ( <i>hisI</i> )      | 40903 | Phosphoribosyl-AMP cyclohydrolase        | ++                      | +++                     | ++  | ++                      |
| PA14_67530                      | 42570 | Noncatalytic dihydroorotase-like protein | ++                      | +++                     | ++  | ++                      |
| PA14_67560 ( <i>typA</i> )      | 37710 | GTP-binding protein TypA/BipA            | ++                      | +++                     | +++ | ++, +++, + <sup>d</sup> |
| PA14_68370 ( <i>cysQ</i> )      | 40356 | 3'(2'),5'-bisphosphate nucleotidase      | ++                      | +++                     | ++  | ++                      |
| PA14_69670 ( <i>lysA</i> )      | 27796 | Diaminopimelate decarboxylase            | ++                      | +++                     | NG  | ++                      |
| PA14_70370 ( <i>pyrE</i> )      | 46326 | Orotate phosphoribosyltransferase        | -                       | +++                     | NG  | ++                      |
| PA14_70370 ( <i>pyrE</i> )      | 46326 | Orotate phosphoribosyltransferase        | -                       | +++                     | NG  | +                       |
| PA14_72490 ( <i>polA</i> )      | 31829 | DNA polymerase I                         | +, ++, +++ <sup>d</sup> | ++                      | +++ | ++                      |
| <b>PA14_73370 (<i>gidA</i>)</b> | 44643 | Glucose-inhibited division protein A     | ++                      | -                       | -   | -                       |

<sup>a</sup> Unless labeled otherwise, all mutants have a MAR2xT7 transposon insertion in the respective ORF.

<sup>b</sup> +++, ++, +, -, and NG indicate a phenotype resembling the wild type, slightly attenuated, substantially attenuated, absent, and no growth, respectively.

<sup>c</sup> The *lasR* mutant contains a *TnphoA* insertion in codon 154. The PA14 library does not include a *lasR* mutant.

<sup>d</sup> Due to inconsistent results, phenotypes from each replication are given.
